# Supplementary material for: Management of Donkeys in Assisted Interventions: a Snapshot
Source: Preprints.org preprint supplement (doi:10.20944/preprints202402.0209.v1), 2024-02-05
Supplement: Supplementary file 1 [file Supplement Material (S1) docx.docx]

**Table S1.** Questionnaire on Donkey management in Assisted-Intervention Facilities

| 1. **General** | Yes | No |
| --- | --- | --- |
| Specialized center in Animal Assisted Education and Therapy according to the national guidelines for Animal-Assisted Interventions (AAI) |  |  |
| All kinds of AAI (activities with recreational, educational and therapeutic purposes) |  |  |
| Activities with recreational purpose (AAA) only |  |  |
| Personnel with qualifications relevant to donkey’s welfare  Ex. Master degree in veterinary medicine  Degree in animal husbandry  Animal Welfare Specializations |  |  |
| Staff responsible for cleaning, feeding and animal supervision |  |  |
| Regular collaboration with a veterinarian trained in AAI  (once a month or more often) |  |  |
| Sporadic collaboration with a veterinarian trained in AAI  (less than once a month) |  |  |
| Absence of collaboration with a veterinarian trained in AAI |  |  |
| 1. **Housing** | | |
| Paddock with shelter (tree walls) |  |  |
| Stall with paddock and regulated access |  |  |
| Animal supplies |  |  |
| Home-made solutions |  |  |
| Ground stability or tendency of the paddock’s terrain to remain dry, not to become muddy during bad weather |  |  |
| Grass-covered paddok  (to be assessed at the time of the visit) |  |  |
| Presence of shaded area different from that provided by the shelter or the stall  (to be assessed at the time of the visit) |  |  |
| Presence of environmental enrichment  (to be assessed at the time of the visit) |  |  |
| **3. Feeding** | | |
| Only hay as forage |  |  |
| Only straw as forage |  |  |
| Hay and straw as forage (mostly hay) |  |  |
| Straw and hay as forage (mostly straw) |  |  |
| Free access to pasture all year round |  |  |
| Access to pasture regulated on a seasonal basis |  |  |
| Weekly supplementation of donkeys’ diet with edible plants’ shrubs |  |  |
| Weekly supplementation of donkeys’ diet with shrubs fruits and vegetables |  |  |
| Fruits and vegetables administered as reward during interaction with users |  |  |
| Mineral supplementation  Ex. salt in blocks |  |  |
| Rationed forage |  |  |
| Forage always available (administration *ad libidum*) |  |  |
| Forage bale feeder |  |  |
| Feeding troughs |  |  |
| Suspended net |  |  |
| Forage on the ground |  |  |
| 1. **Health** | | |
| Weight monitoring: weight measurement or estimation through chest circumference and height at the withers (once a month or more often) |  |  |
| Dental check-up and corrective interventions (once a year) |  |  |
| Hoof check and potential trimming (once every three month or more often) |  |  |
| Hoof check and potential trimming (less than once every three month) |  |  |
| Vaccination for Equine Influenza and Tetanus (once a year) |  |  |
| Vaccination for Nile Disease (once a year) |  |  |
| No vaccinations |  |  |
| Endoparasites monitoring through fecal exam and selective treatment (once a year) |  |  |
| Blind administration of antiparasitic drug (once or twice a year) |  |  |
